# Supplementary material for: Effect of the TrFE Content on the Crystallization and SSA Thermal Fractionation of P(VDF-co-TrFE) Copolymers
Source: MDPI journal article supplement (doi:10.3390/ijms231810365), 2022-09-08
Supplement: s1 [file s1]

Effect of the TrFE Content on the Crystallization and SSA thermal fractionation of P(VDF-co-TrFE) copolymers

Nicolás María<sup>1</sup>, Florian Le Goupil<sup>2</sup>, Dario Cavallo<sup>3</sup>, Jon Maiz<sup>1,4,5\*</sup> and Alejandro J. Müller<sup>1,5\*</sup>

<sup>1</sup> POLYMAT and Department of Polymers and Advanced Materials: Physics, Chemistry and Technology, University of the Basque Country UPV/EHU, Paseo Manuel de Lardizábal 3, 20018 Donostia-San Sebastián, Spain.

<sup>2</sup> Laboratoire de Chimie des Polymères Organiques (LCPO - UMR 5629), Bordeaux INP, Université de Bordeaux, CNRS, 16 Av. Pey-Berland, 33607 Pessac, France

<sup>3</sup> Department of Chemistry and Industrial Chemistry, University of Genova, 16146 Genova, Italy.

<sup>4</sup> Centro de Física de Materiales (CFM) (CSIC-UPV/EHU)-Materials Physics Center (MPC), Paseo Manuel de Lardizábal 5, 20018 Donostia-San Sebastián, Spain

<sup>5</sup> IKERBASQUE, Basque Foundation for Science, Plaza Euskadi 5, 48009 Bilbao, Spain.

**\*Corresponding author:** [jon.maizs@ehu.eus](mailto:jon.maizs@ehu.eus)  
[alejandrojesus.muller@ehu.es](mailto:alejandrojesus.muller@ehu.es)

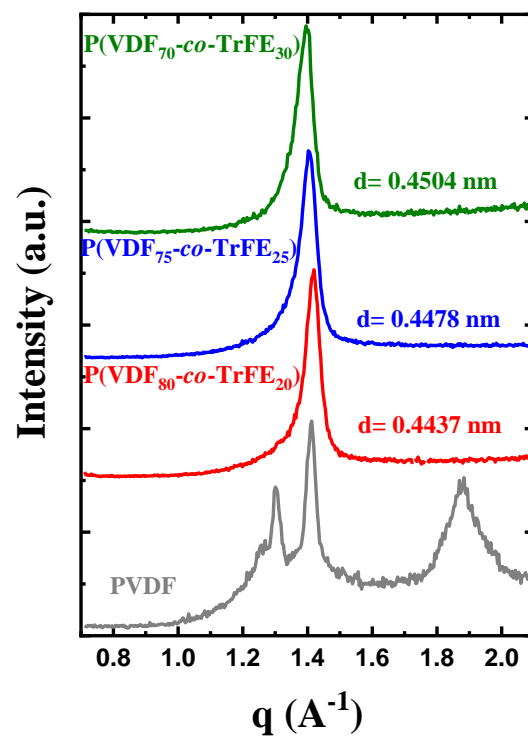

**Figure S1.** WAXS analysis of the PVDF homopolymer and P(VDF-*co*-TrFE) copolymers after a cooling scan at 20 °C/min. The  $d$  values were added in order to appreciate the TrFE inclusion in the PVDF crystals.

**Table S1.** List of the parameters obtained through the Lauritzen and Hoffman theory applied in the PLOM experiments.

| Sample                                       | $K_g^G$ (K <sup>2</sup> ) | $R^2$ | $\sigma_e$ (erg/cm <sup>2</sup> ) | $\sigma$ (erg/cm <sup>2</sup> ) | $Q$ (erg)              |
|----------------------------------------------|---------------------------|-------|-----------------------------------|---------------------------------|------------------------|
| PVDF homopolymer                             | 6.73x10 <sup>4</sup>      | 0.970 | 60.4                              | 7.86                            | 2.2x10 <sup>-13</sup>  |
| P(VDF <sub>80-co</sub> -TrFE <sub>20</sub> ) | 3.86x10 <sup>4</sup>      | 0.998 | 35.1                              | 7.86                            | 1.29x10 <sup>-13</sup> |
| P(VDF <sub>75-co</sub> -TrFE <sub>25</sub> ) | 9.70x10 <sup>4</sup>      | 0.970 | 87.5                              | 7.86                            | 3.23x10 <sup>-13</sup> |
| P(VDF <sub>70-co</sub> -TrFE <sub>30</sub> ) | 5.84x10 <sup>4</sup>      | 0.970 | 52.4                              | 7.86                            | 1.93x10 <sup>-13</sup> |

The values of  $K_g^G$  observed in Table S1 are the parameters obtained from Figure 3. These values are valid for the overall crystallization temperatures as the L-H solid lines exhibit in Figure 3. In the case of the neat PVDF, at high temperatures the  $G$  values are higher than the copolymer values, however when the isothermal temperature decreases the  $G$  values of the neat PVDF decreases and tends to lower values. Therefore, the  $K_g^G$  values of the samples do not have any tendency with the proportion of TrFE or PVDF, because the overall values are compensated for the whole range of temperatures.

**Table S2.** All the parameters calculated through the Lauritzen and Hoffman theory applied for every sample by DSC experiments.

| Sample                                       | $K_g^\tau$ (K <sup>2</sup> ) | $R^2$ | $\sigma_e$ (erg/cm <sup>2</sup> ) | $\sigma$ (erg/cm <sup>2</sup> ) | $q$ (erg)              |
|----------------------------------------------|------------------------------|-------|-----------------------------------|---------------------------------|------------------------|
| PVDF homopolymer                             | 1.29x10 <sup>5</sup>         | 0.996 | 116.2                             | 7.86                            | 4.29x10 <sup>-13</sup> |
| P(VDF <sub>80-co</sub> -TrFE <sub>20</sub> ) | 1.26x10 <sup>5</sup>         | 0.998 | 113.9                             | 7.86                            | 4.20x10 <sup>-13</sup> |
| P(VDF <sub>75-co</sub> -TrFE <sub>25</sub> ) | 1.46x10 <sup>5</sup>         | 0.994 | 131.8                             | 7.86                            | 4.86x10 <sup>-13</sup> |
| P(VDF <sub>70-co</sub> -TrFE <sub>30</sub> ) | 1.63x10 <sup>5</sup>         | 0.995 | 146.7                             | 7.86                            | 5.42x10 <sup>-13</sup> |

In this case the  $K_g^\tau$  values have a logical tendency with the composition of the copolymer samples. The neat PVDF and P(VDF<sub>80-co</sub>-TrFE<sub>20</sub>) samples have similar values as can be observed in Figure 6a. When the content of TrFE increases the values of  $K_g^\tau$  also increases. In addition, the values of  $K_g^\tau$  are higher than the values of  $K_g^G$ , these

results are consistent because the values of  $K_g^G$  only includes the growth of the crystals whereas the  $K_g^\tau$  includes growth and nucleation processes.

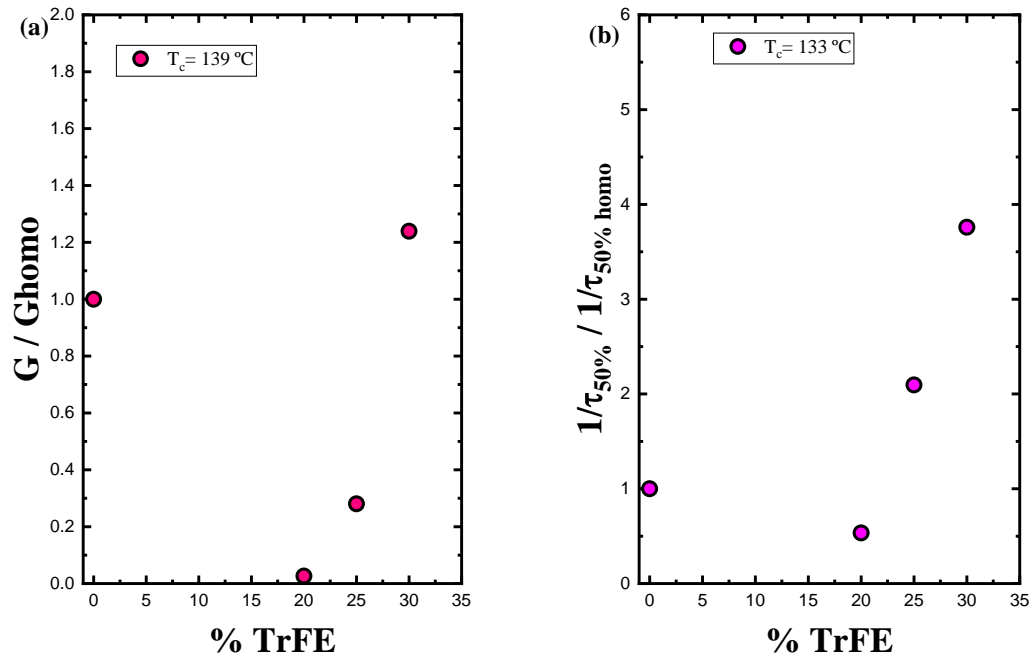

**Figure S2.** (a)  $G/G_{\text{homopolymer}}$  relation against the TrFE content at  $T_c = 139^\circ\text{C}$ , and (b)  $(1/\tau_{50\%})/(1/\tau_{50\% \text{ homopolymer}})$  relation against the TrFE content at  $T_c = 133^\circ\text{C}$ .

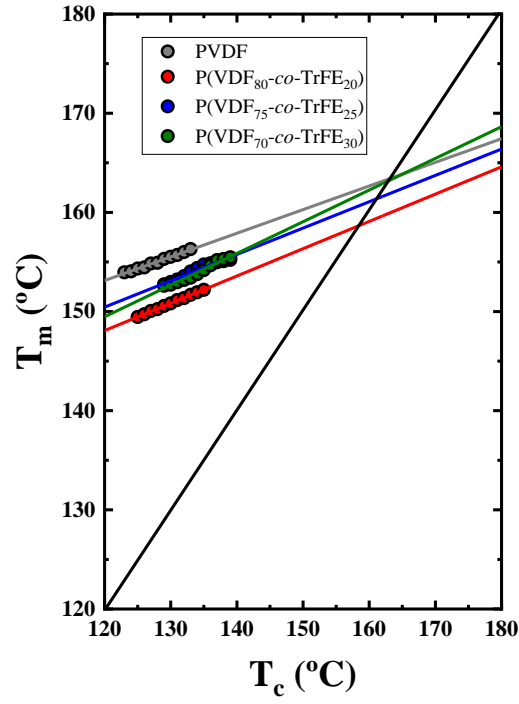

**Figure S3.** Isothermal crystallization temperature against the melting temperature in order to achieve the equilibrium melting temperature ( $T_m^0$ ) by Hoffman-Weeks method for neat PVDF and the copolymers.

**Table S3.** Equilibrium melting temperature values for each sample obtained by Hoffman-Weeks theory.

| Sample       | PVDF  | P(VDF <sub>80-co</sub> -TrFE <sub>20</sub> ) | P(VDF <sub>75-co</sub> -TrFE <sub>25</sub> ) | P(VDF <sub>70-co</sub> -TrFE <sub>30</sub> ) |
|--------------|-------|----------------------------------------------|----------------------------------------------|----------------------------------------------|
| $T_m^0$ (°C) | 163.3 | 158.4                                        | 161.1                                        | 163.0                                        |

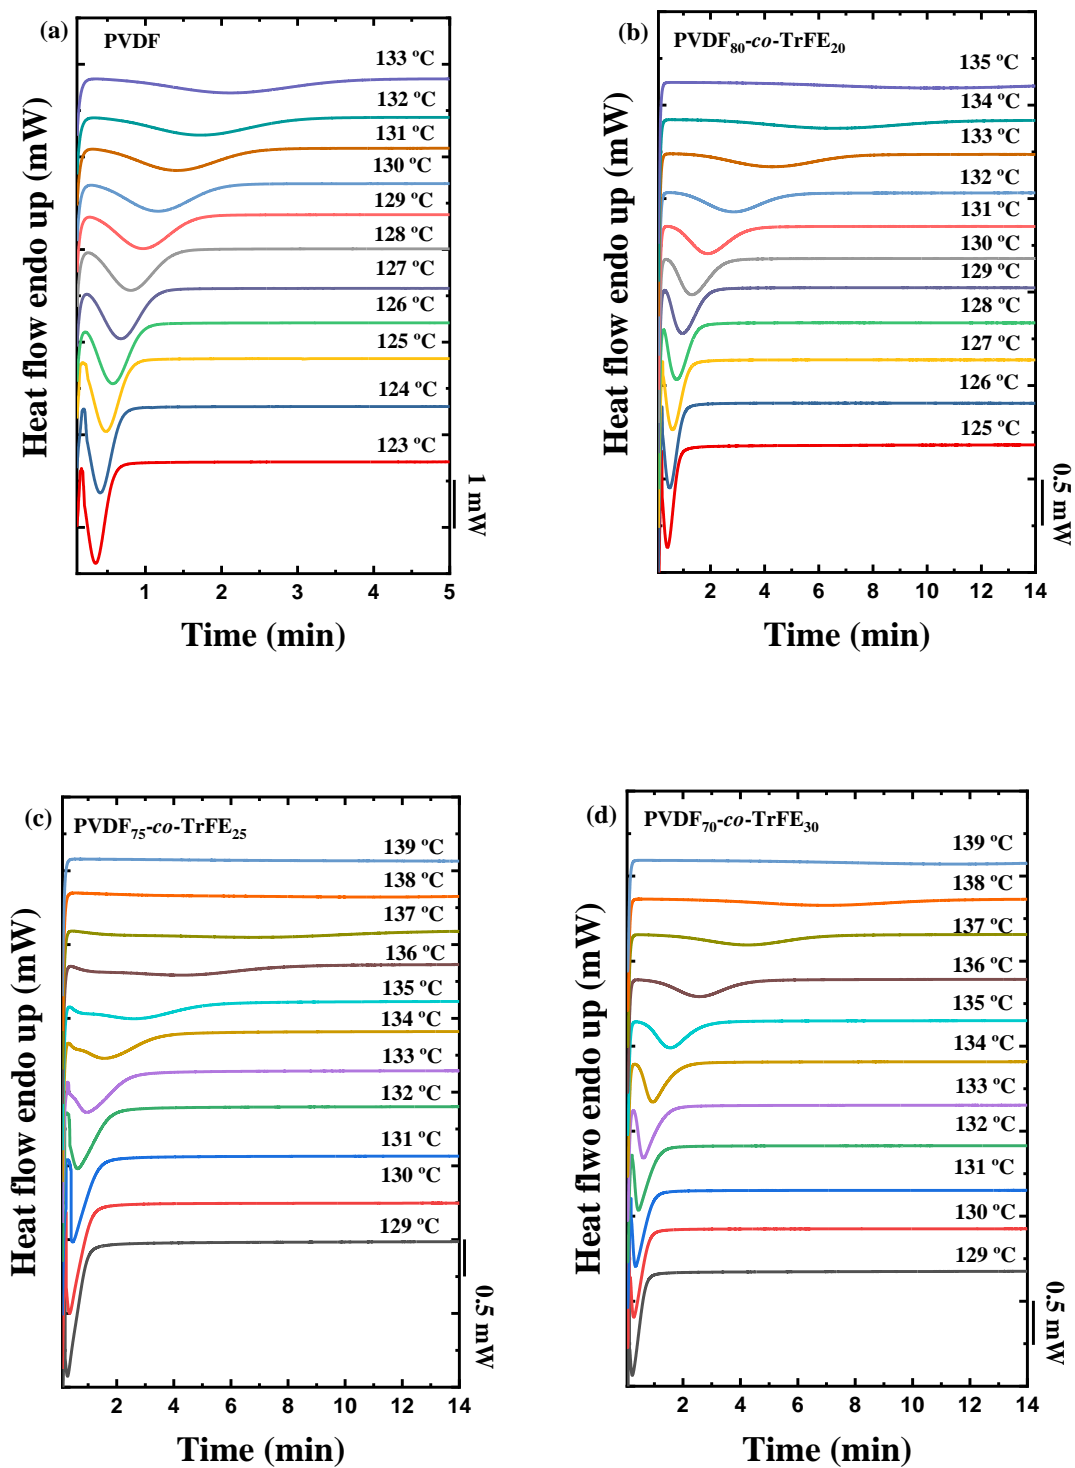

**Figure S4.** DSC curves of all the isothermal crystallization experiments of (a) PVDF homopolymer, (b) P(VDF<sub>80</sub>-co-TrFE<sub>20</sub>), (c) P(VDF<sub>75</sub>-co-TrFE<sub>25</sub>) and (d) P(VDF<sub>70</sub>-co-TrFE<sub>30</sub>).

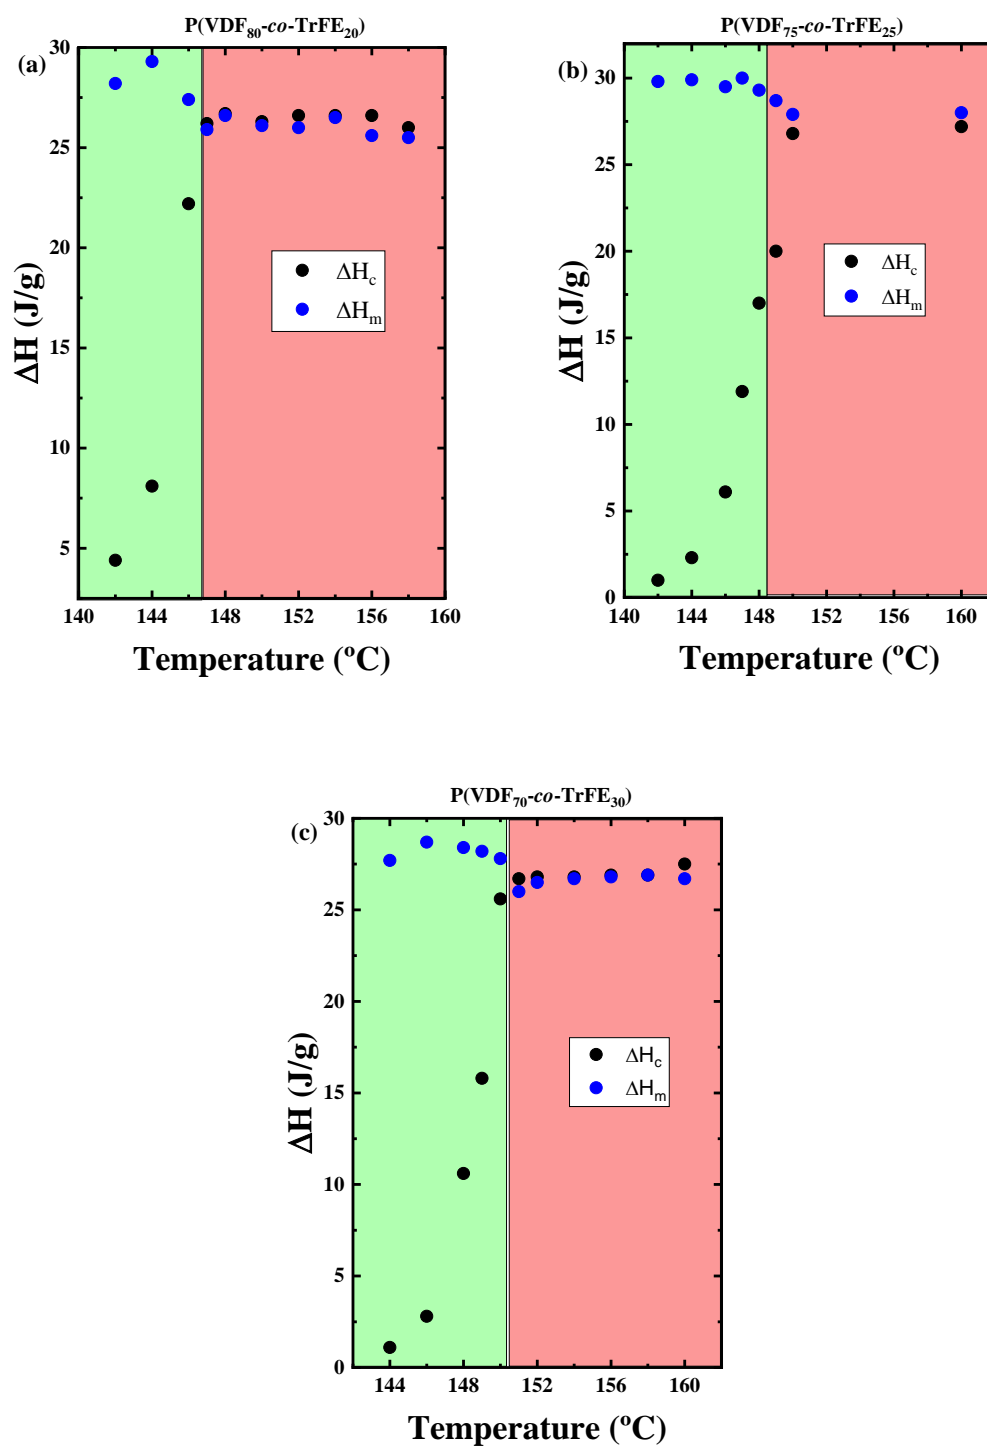

**Figure S5.** Crystallization and melting enthalpies in each  $T_s$  value for the (a) P(VDF<sub>80-co</sub>-TrFE<sub>20</sub>), (b) P(VDF<sub>75-co</sub>-TrFE<sub>25</sub>) and (c) P(VDF<sub>70-co</sub>-TrFE<sub>30</sub>). The green part indicates the temperatures that belong to the *Domain III* and the red part corresponds to the *Domain I*.



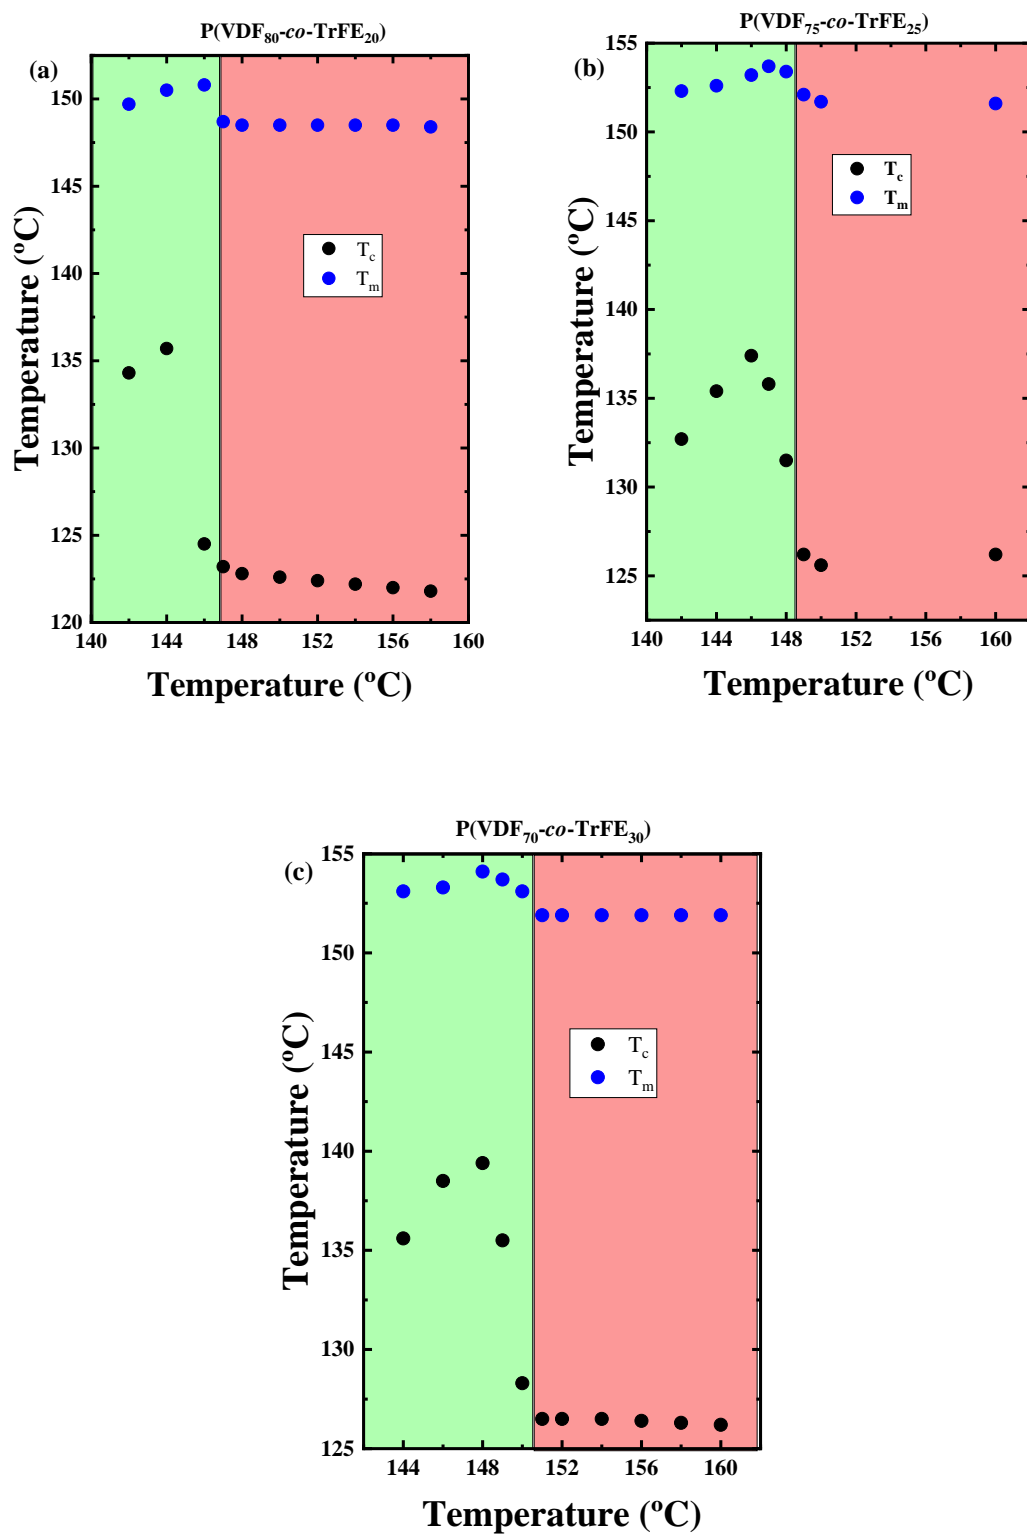

**Figure S6.** Melting and crystallization temperatures at respective  $T_s$  values for (a) P(VDF<sub>80-co</sub>-TrFE<sub>20</sub>), (b) P(VDF<sub>75-co</sub>-TrFE<sub>25</sub>) and (c) P(VDF<sub>70-co</sub>-TrFE<sub>30</sub>). The green part indicates the temperatures that belong to the *Domain III* and the red part corresponds to the *Domain I*.

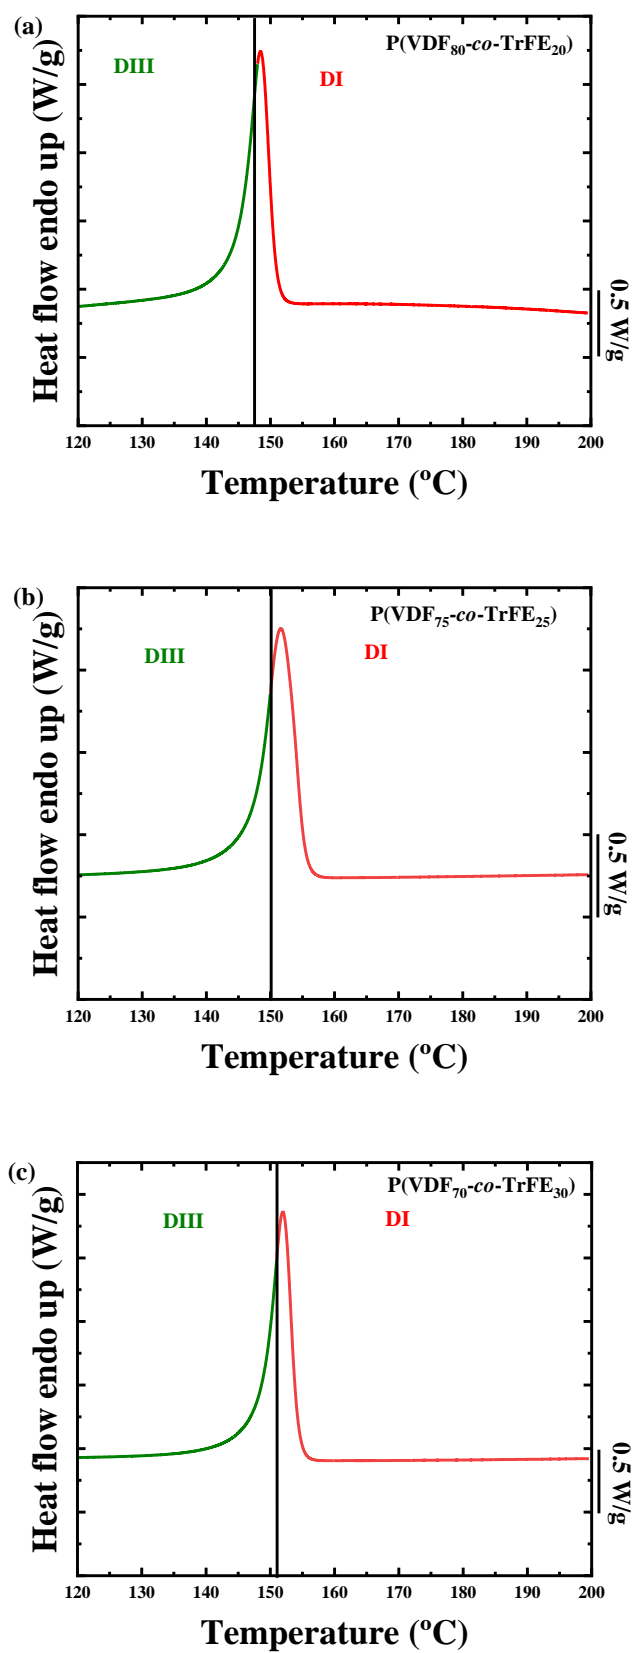

**Figure S7.** Representation of each *Domain* in the self-nucleation process in a standard melting curve of (a) P(VDF<sub>80-co</sub>-TrFE<sub>20</sub>), (b) P(VDF<sub>75-co</sub>-TrFE<sub>25</sub>) and (c) P(VDF<sub>70-co</sub>-TrFE<sub>30</sub>) samples.
